# Supplementary material for: Arctic biocrusts highlight genetic variability in photosynthesis as a key driver of biodiversity
Source: Research Square preprint supplement (doi:10.21203/rs.3.rs-6899352/v1), 2025-11-17
Supplement: Supplementary file 1 [file 6ba9725f85665a834e3f15c1.xlsx]

## Sheet: Suppl. Table 1
Supplementary Table 1. Vegetation recorded (+) in the sampling sites.
Taxon	KnudL	GeopL	KnauH	OsL	OsH	BlL	BlH	KnL	KnH
Angiosperms
Arenaria sp.			+
Bistorta vivipara	+	+		+	+	+	+	+	+
Carex fuliginosa				+	+
Carex rupestres							+
Carex sp.	+	+	+	+		+		+
Casiope tetragona						+
Cerastium alpinum		+		+			+
Cerastium alpinum	+
Dryas octopetala	+			+	+	+	+	+	+
Juncus biglumis		+
Luzula alpina	+
Luzula arctica		+
Oxyria digyna		+
Papaver dhalianum					+		+
Pedicularis hirsuta	+							+
Sagina nivalis	+	+					+
Salix polaris	+	+		+	+		+	+	+
Salix reticulata				+
Saxifraga aizoides								+
Saxifraga cernua	+	+	+	+			+
Saxifraga oppositifolia	+	+	+	+	+	+	+	+	+
Silene acaulis	+	+		+		+
Silene uralensis	+
Bryophytes
Bryum sp.				+	+
Dicranella sp.					+
Dicranum sp.			+						+
Drepanoclados sp.				+
Enclayptra sp.	+
Hypnum sp.	+	+		+	+	+	+	+	+
Polytrchium sp.	+	+		+	+		+
Pottia sp.			+
Preissia quadrata			+
Racomitrium sp.							+		+
Tetraplodon sp.
Unidentified moss 1	+	+		+
Unidentified moss 3	+		+
Unidentified moss 4									+
Unidentified moss 5									+
Unidentified moss 2			+			+		+
Unidentified Pottiales					+
Lichens
Cetrariella alpinum	+	+				+		+	+
Collema sp.									+
Flavocetraria nivalis				+	+		+		+
Stereocaulon alpinum	+	+		+	+	+	+	+	+
Thamnolia vermicularis					+		+		+
Unidentified lichen 1	+		+		+	+	+	+	+
Unidentified lichen 2									+

## Sheet: Suppl. Table 2
Supplementary Table 2. Two-way ANOVA of gene counts associated with photosynthesis and exclusive to phototrophs showing effects of locality, elevation, and their interaction (* p < 0.05, **p < 0.01, ***p < 0.001, ns: non-significant).
	Locality	Elevation	Locality x Elevation
Photosystem I	13.4***	6.4*	ns
psaA	20.2***	4.8*	ns
psaB	17.3***	8.5**	ns
psaC	ns	ns	ns
psaD	ns	ns	ns
psaE	3.3*	ns	ns
psaF	3.9*	ns	ns
psaG	20.1***	ns	16.6***
psaH	ns	ns	ns
psaI	4.6*	ns	ns
psaJ	20.2***	16.8***	13.7***
psaK	ns	ns	ns
psaL	ns	ns	4.5*
psaM	ns	ns	ns
psaN	ns	ns	ns
ycf3	7.9**	7.2*	ns
ycf4	6.4**	ns	ns
btpA	ns	ns	ns
psa2	10.3***	ns	ns
cpcL	9.1***	ns	4.3*
Photosystem II	6.3**	ns	ns
psbA	4.3*	ns	ns
psbB	9.5***	ns	ns
psbC	18.8***	5.1*	ns
psbD	13.8***	ns	ns
psbE	4.4*	ns	ns
psbF	ns	ns	ns
psbH	22.6***	9.2**	8.6***
psbI	ns	ns	ns
psbJ	ns	ns	ns
psbK	20.1***	5.7*	9.7***
psbL	3.5*	ns	ns
psbM	ns	ns	ns
psbO	ns	ns	4.7*
psbP	ns	ns	5.9**
psbQ	3.5*	ns	ns
psbR	5.7**	4.8*	ns
psbT	21.5***	13.7***	25.9***
psbU	ns	ns	ns
psbV	ns	ns	ns
psbX	ns	ns	ns
psbY	ns	ns	5.2**
psbZ	17.7***	14.5***	8.8***
psb27	ns	ns	ns
psb28	ns	ns	ns
psb34	ns	ns	4.9*
ycf12	5.5**	ns	ns
ycf39	ns	ns	8.3***
ycf48	ns	ns	ns
ctpA	9.0***	ns	ns
Electron Transport Chain - Cytochrome b6f Complex Genes	ns	ns	ns
petA	5.1**	4.6*	ns
petC	ns	ns	ns
petD	ns	ns	ns
petE	ns	ns	ns
petG	15.2***	10.3**	4.5*
petM	ns	ns	ns
petN	ns	ns	ns
ccda	ns	ns	ns
Associated and regulatory genes	27.2***	9.6**	10.2***
psbS	17.1***	ns	6.7**
hcf136	34.5***	13.8***	12.7***
STN7, STN8	ns	ns	ns
CURT1B	ns	ns	ns
LhcsR	11.3***	9.1**	3.5*
LHCI	27.1***	7.2**	21.5***
LHCII	29.0***	14.9***	14.3***
Chlorophyll Biosynthesis	ns	6.4*	ns
chlD	ns	ns	ns
chlE	ns	ns	ns
chlG	ns	ns	ns
chlH	ns	ns	ns
chlI	15.0***	10.3**	ns
chlM	ns	ns	ns
chlP	ns	ns	ns
LPOR	18.4***	ns	ns
CAO	8.3***	10.5**	ns
