# Supplementary material for: Arctic biocrusts highlight genetic variability in photosynthesis as a key driver of biodiversity
Source: Research Square preprint supplement (doi:10.21203/rs.3.rs-6899352/v1), 2025-11-17
Supplement: Supplementary file 2 [file e80aad0aeaea97858d66449e.docx]

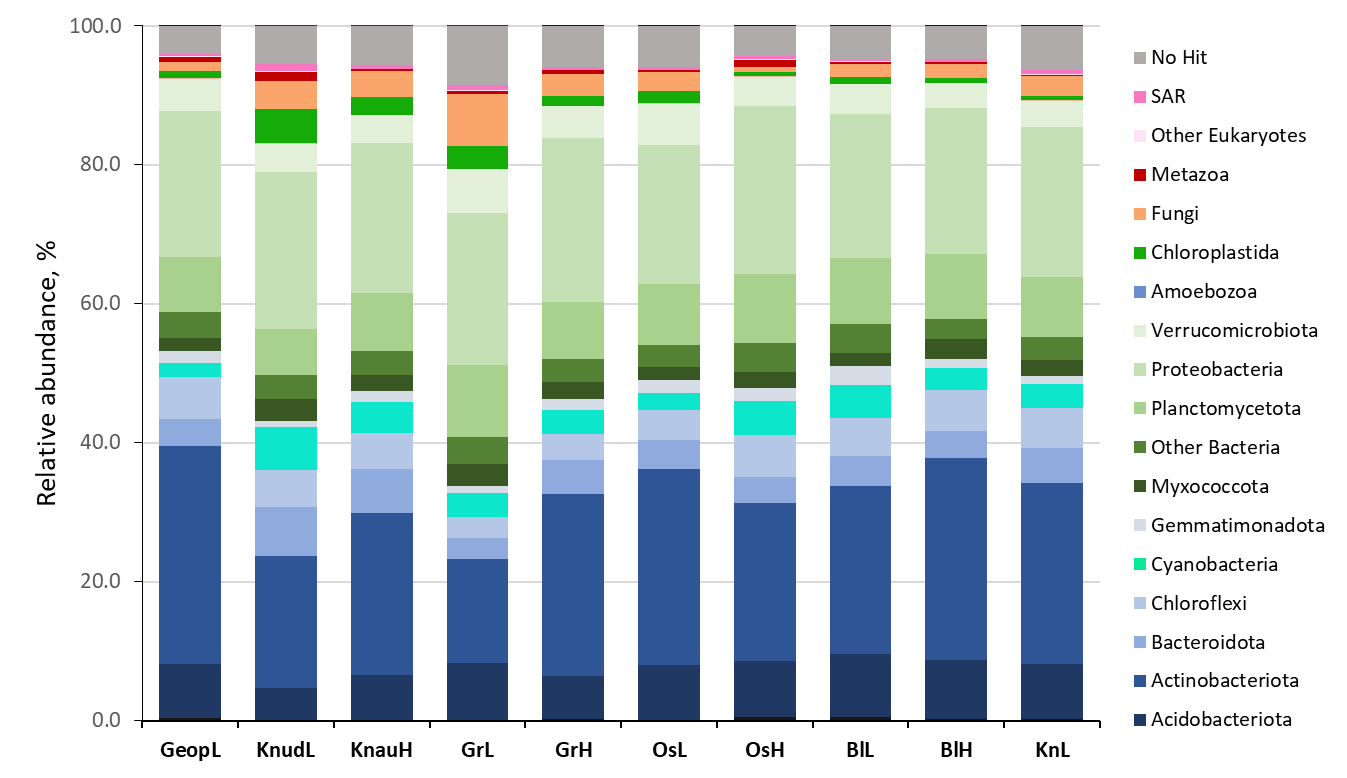


**Supplementary Figure 1** – Taxonomic profile of the biocrusts based on rRNAs obtained by metagenomic sequencing.


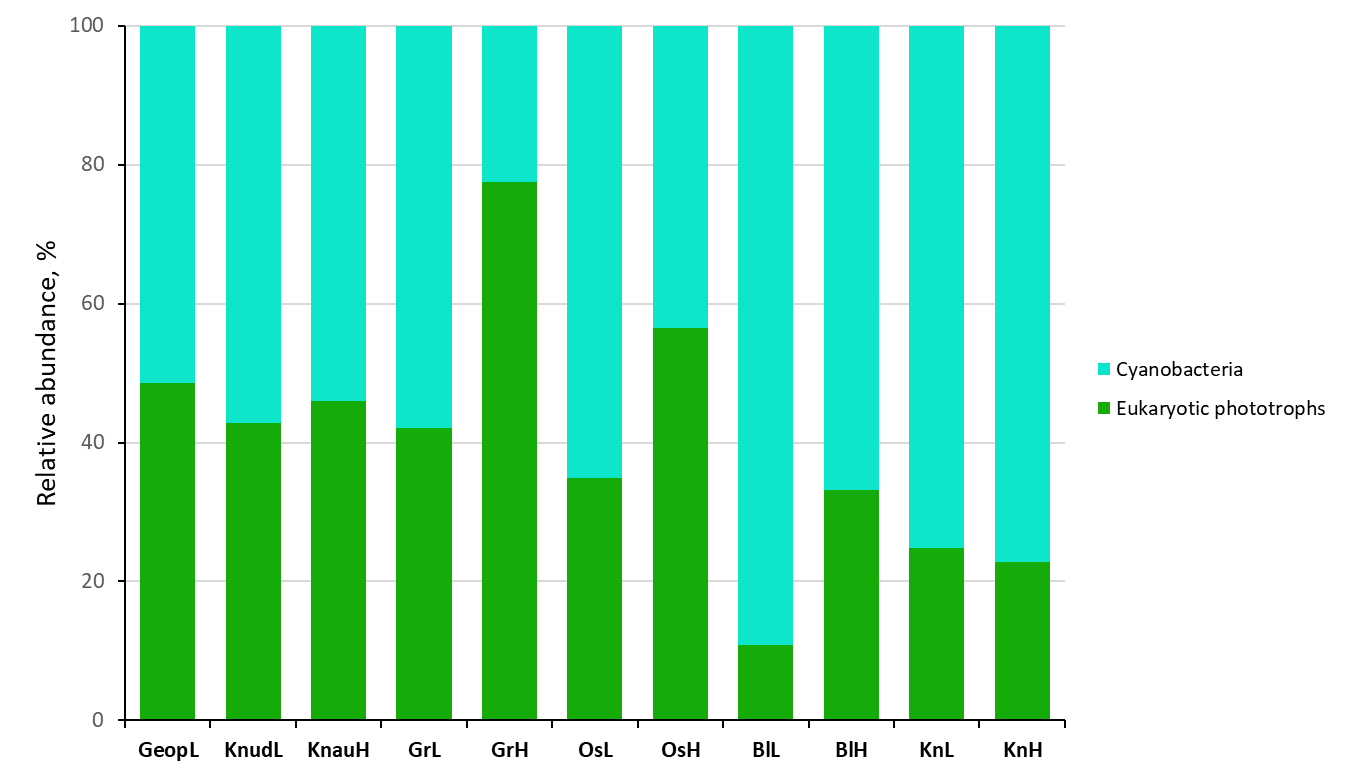


**Supplementary Figure 2 –** Relative abundances of phototrophic community of cyanobacteria and eukaryotic phototrophs based on 16S and 18S rRNA, respectively.
